# Supplementary material for: The Eligibility of Green Bonds as Safe Haven Assets: A Systematic Review
Source: MDPI journal article supplement (doi:10.3390/su15086841), 2023-04-18
Supplement: s1 [file s1]

Archive with 1 entries (1 files):
- sustainability-2329201-supplementary.pdf
